# Supplementary material for: The Membrane-Anchoring Region of the AcMNPV P74 Protein Is Expendable or Interchangeable with Homologs from Other Species
Source: MDPI journal article supplement (doi:10.3390/v13122416), 2021-12-02
Supplement: s1 [file s1]

## Supplementary Material

**Table S1.** Sequences used in the P74 phylogeny inference

| Species                                  | Isolate    | Denomination | GenBank   |
|------------------------------------------|------------|--------------|-----------|
| <b><i>Alphabaculovirus</i> (group I)</b> |            |              |           |
| <i>Antheraea pernyi</i> NPV              | Z          | AnpeNPV-Z    | NC_008035 |
| <i>Anticarsia gemmatilis</i> MNPV        | 2D         | AgMNPV       | NC_008520 |
| <i>Autographa californica</i> MNPV       | Clone C6   | AcMNPV       | NC_001623 |
| <i>Bombyx mori</i> NPV                   | T3         | BmNPV        | NC_001962 |
| <i>Catopsilia pomona</i>                 | 416        | CapoNPV      | NC_030240 |
| <i>Choristoneura fumiferana</i> MNPV     |            | CfMNPV       | NC_004778 |
| <i>Condylorrhiza vestigialis</i> MNPV    |            | CoveMNPV     | NC_026430 |
| <i>Cyclophragma undans</i> NPV           | Whiov      | CyunNPV-Wh   | KT957089  |
| <i>Dasychira pudibunda</i> NPV           | ML1        | DapuNPV      | KP747440  |
| <i>Dendrolimus kikuchii</i> NPV          | strain YN  | DekiNPV      | JX193905  |
| <i>Epiphyas postvittana</i> NPV          |            | EppoNPV      | NC_003083 |
| <i>Hyphantria cunea</i> NPV              |            | HycuNPV      | NC_007767 |
| <i>Lonomia obliqua</i> MNPV              | SP/2000    | LoobMNPV     | KP763670  |
| <i>Maruca vitrata</i> NPV                |            | MaviNPV      | NC_008725 |
| <i>Orgyia pseudotsugata</i> MNPV         |            | OpMNPV       | NC_001875 |
| <i>Oxyplax ochracea</i> NPV              | 435        | OxocNPV-435  | MF143631  |
| <i>Philosamia cynthia ricini</i> NPV     |            | PhcyNPV      | JX404026  |
| <i>Plutella xylostella</i> MNPV          | CL3        | PlxyMNPV     | NC_008349 |
| <i>Rachiplusia ou</i> MNPV               |            | RoMNPV       | NC_004323 |
| <i>Samia cynthia</i> NPV                 | Nagano     | SacyNPV-Na   | LC375538  |
| <i>Spilosoma obliqua</i> NPV             | IIPR       | SpobNPV-IIPR | KY550224  |
| <i>Thysanoplusia orichalcea</i> NPV      | P2         | ThorNPV-P2   | NC_019945 |
| <b><i>Alphabaculovirus</i> (group I)</b> |            |              |           |
| <i>Adoxophyes honmai</i> NPV             |            | AdhoNPV      | NC_004690 |
| <i>Agrotis ipsilon</i> MNPV              |            | AgipMNPV     | NC_011345 |
| <i>Apocheima cinerarium</i> NPV          |            | ApciNPV      | NC_018504 |
| <i>Buzura suppressaria</i> NPV           | Hubei      | BusuNPV      | NC_023442 |
| <i>Chrysodeixis chalcites</i> NPV        |            | ChchNPV      | NC_007151 |
| <i>Clanis bilineata</i> NPV              | DZ1        | ClbiNPV      | NC_008293 |
| <i>Ectropis obliqua</i> NPV              | Strain A1  | EcobNPV      | NC_008586 |
| <i>Euproctis pseudoconspersa</i> NPV     |            | EupsNPV      | NC_012639 |
| <i>Helicoverpa armigera</i> MNPV         |            | HaMNPV       | NC_011615 |
| <i>Helicoverpa armigera</i> NPV          | Strain G4  | HearSNPV-G4  | NC_002654 |
| <i>Hemileuca sp</i> NPV                  |            | HespNPV      | NC_021923 |
| <i>Hyposidra talaca</i> NPV              |            | HytaNPV      | MH261376  |
| <i>Lambdina fiscellaria</i> NPV          | GR15       | LafiNPV-GR15 | NC_026922 |
| <i>Leucania separata</i> NPV             | Strain AH1 | LeseNPV      | NC_008348 |
| <i>Lymantria dispar</i> MNPV             |            | LdMNPV       | NC_001973 |
| <i>Mamestra brassicae</i> MNPV           | K1         | MabrMNPV-K1  | NC_023681 |
| <i>Operophtera brumata</i> NPV           | MA         | OpbuNPV-MA   | NC_040621 |
| <i>Orgyia leucostigma</i> NPV            | CFS77      | OrleNPV      | NC_010276 |
| <i>Peridroma sp</i> NPV                  | GR-167     | PespNPV      | NC_024625 |

|                                                         |                 |                |              |
|---------------------------------------------------------|-----------------|----------------|--------------|
| <i>Perigonia lusca</i> SNPV                             |                 | PeluSNPV       | NC_027923    |
| <i>Pseudoplusia includens</i> SNPV                      | IE              | PsinSNPV-IE    | NC_026268    |
| <i>Spodoptera exigua</i> MNPV                           |                 | SeMNPV         | NC_002169    |
| <i>Spodoptera frugiperda</i> MNPV                       | 3AP2            | SfMNPV-3AP2    | NC_009011    |
| <i>Spodoptera littoralis</i> NPV                        | AN1956          | SpliNPV-AN1956 | JX454574     |
| <i>Spodoptera litura</i> II MNPV                        |                 | SpltMNPV-II    | NC_011616    |
| <i>Sucra jujuba</i> NPV                                 | 473             | SujuNPV-473    | KJ676450     |
| <i>Trichoplusia ni</i> SNPV                             |                 | TnSNPV         | NC_007383    |
| <i>Urbanus proteus</i> NPV                              | Southern Brazil | UrprNPV        | NC_029997    |
| <b>Betabaculovirus</b>                                  |                 |                |              |
| <i>Adoxophyes orana</i> GV                              |                 | AdorGV         | NC_005038    |
| <i>Agrotis segetum</i> GV                               |                 | AgseGV         | NC_005839    |
| <i>Choristoneura occidentalis</i> GV                    |                 | ChocGV         | NC_008168    |
| <i>Clostera anachoreta</i> GV                           | HBHN            | ClanGV         | NC_015398    |
| <i>Cnapahlocrocis medinalis</i> GV                      | Strain Enping   | CnmeGV-E       | NC_029304    |
| <i>Cryptophlebia leucotreta</i> GV                      |                 | CrleGV         | NC_005068    |
| <i>Cydia pomonella</i> GV                               |                 | CpGV           | NC_002816    |
| <i>Diatraea saccharalis</i> GV                          | Parana-2009     | DisaGV-P09     | NC_028491    |
| <i>Epinotia aporema</i> GV                              |                 | EpapGV         | NC_018875    |
| <i>Erinnyis ello ello</i> GV                            | Strain BrS86    | ErelGV         | NC_025257    |
| <i>Helicoverpa armigera</i> GV                          |                 | HearGV         | NC_010240    |
| <i>Mocis latipes</i> GV                                 | Southern Brazil | MolaGV         | NC_029996    |
| <i>Mythimna unipuncta</i> GV                            | MyunGV#8        | MyunGV         | NC_033780    |
| <i>Phthorimaea operculella</i> GV                       |                 | PhopGV         | NC_004062    |
| <i>Pseudaletia unipuncta</i> GV                         | Strain Hawaiiin | PsunGV         | NC_013772    |
| <i>Pieris rapae</i> GV                                  | Wuhan           | PiraGV         | NC_013797    |
| <i>Plodia interpunctella</i> GV                         | Cambridge       | PlinGV         | NC_032255    |
| <i>Plutella xylostella</i> GV                           |                 | PxGV           | NC_002593    |
| <i>Spodoptera frugiperda</i> GV                         | VG008           | SpfrGV         | NC_026511    |
| <i>Spodoptera litura</i> GV                             | Strain K1       | SpltGV         | NC_009503    |
| <i>Trichoplusia ni</i> GV                               | LBIV-12         | TrniGV-LBIV12  | KU752557     |
| <i>Xestia c nigrum</i> GV                               |                 | XecnGV         | NC_002331    |
| <b>Gammabaculovirus</b>                                 |                 |                |              |
| <i>Neodiprion lecontei</i> NPV                          |                 | NeleNPV        | NC_005906    |
| <i>Neodiprion sertifer</i> NPV                          |                 | NeseNPV        | NC_005905    |
| <i>Neodiprion abietis</i> NPV                           |                 | NeabNPV        | DQ317692     |
| <b>Deltabaculovirus</b>                                 |                 |                |              |
| <i>Culex nigripalpus</i> NPV                            | Florida1997     | CuniNPV        | NC_003084    |
| <b>Nudiviridae</b>                                      |                 |                |              |
| <i>Gryllus bimaculatus nudivirus</i>                    |                 | GrBNV          | NC_009240.1  |
| <b>Hytrosaviridae</b>                                   |                 |                |              |
| <i>Musca domestica</i> salivary gland hypertrophy virus |                 | MdSGHV         | NC_010671.1  |
| <b>Nimaviridae</b>                                      |                 |                |              |
| <i>Marsupenaeus japonicus</i> endogenous nimavirus DNA  |                 | Nimav-1_LVa    | BFCD01000001 |
| White spot syndrome virus strain                        | MEX2008         | WSSV           | KU216744     |

**Table S2.** P74 Molecular weight and isoelectric point

| P74                 | MW<br>(Da) | PI   |
|---------------------|------------|------|
| AcMNPV (complete)   | 73,885.48  | 4.90 |
| SeMNPV (complete)   | 74,213.85  | 4.94 |
| HearSNPV (complete) | 78,406.81  | 5.13 |
| AcMNPV (Nt)         | 51,673.47  | 6.52 |
| SeMNPV (Nt)         | 51,606.36  | 6.48 |
| HearSNPV (Nt)       | 54,706.64  | 6.06 |
| AcMNPV (Ct)         | 22,230.02  | 3.95 |
| SeMNPV (Ct)         | 22,625.51  | 3.99 |
| HearSNPV (Ct)       | 23,718.18  | 4.45 |

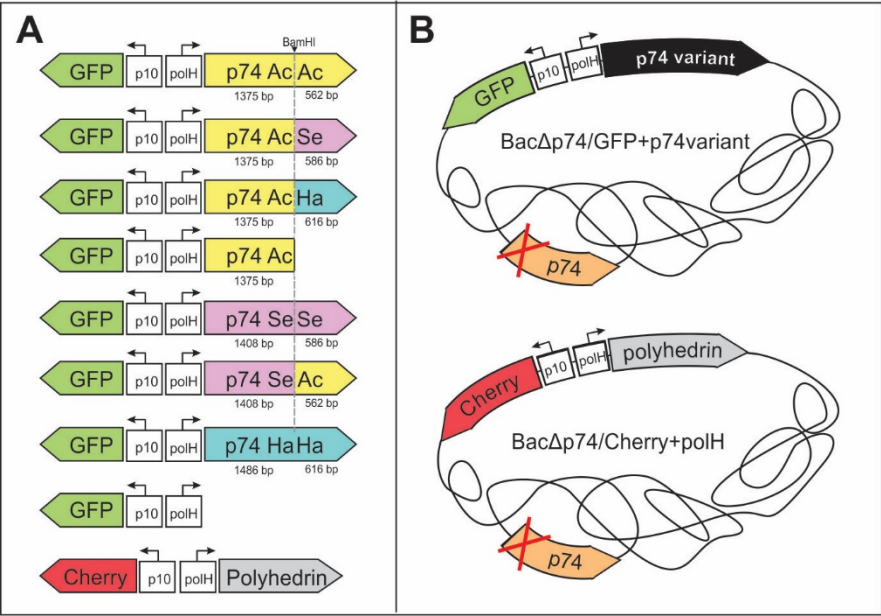

**Figure S1. AcMNPV variants.** The ORF of the *p74* gene of AcMNPV, SeMNPV and HearSNPV were used alone or combining sectors corresponding to the protein amino and carboxyl terminals. **A.** Illustration showing the composition of the different donor plasmids generated containing the *p74* variants and GFP, or polyhedrin and mCherry. Grey dotted line represents the BamHI recognition site between the amino and carboxyl P74 protein domains. **B.** Illustration showing bacmids deficient in the *p74* gene (indel mutation by CRISPR/Cas9 technology and NHEJ) after Bac-to-Bac complementation, one contributing with polyhedrin and the other one with a P74 variant. When both are coinfecting in the same cells OBs can be generated with *per os* infective potential.

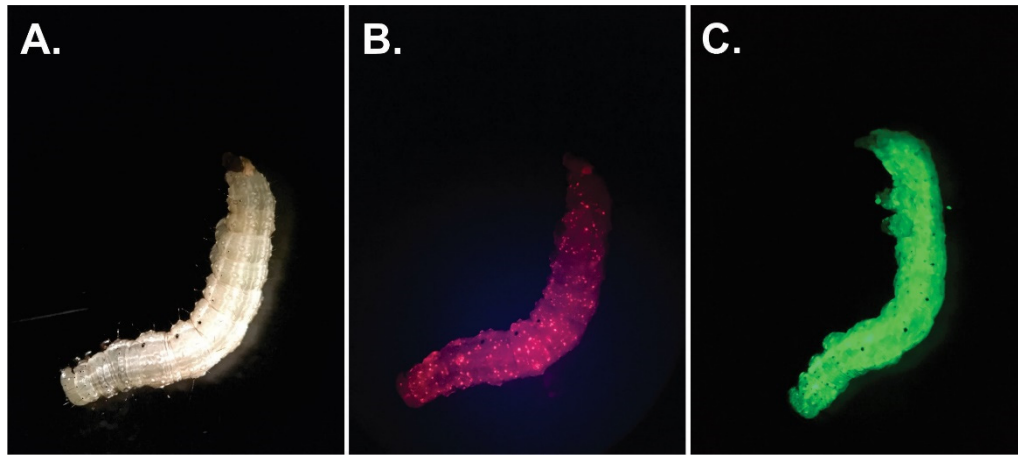

**Figure S2. Infectivity of complemented AcMNPV p74 knockout.** *R. nu* larvae exposed to virions derived from AcMNPV knocked out in *p74* and supplemented with the ORF variant of the same virus carrying the point mutation to introduce the BamHI site. Photographs (0.8X) taken 120 hours after treatment with the virus through *per os* route showing the appearance of a larva in bright field (A.), and the mCherry (B.) and GFP (C.) expression.
